# Supplementary material for: Can Waterlow score predict 30-day mortality and length of stay in acutely admitted medical patients (aged ≥65 years)? Evidence from a single centre prospective cohort study
Source: PubMed Central journal article supplement — BMJ Open. 2019 Nov 14;9(11):e032347. doi: 10.1136/bmjopen-2019-032347 (PMC6886901; doi:10.1136/bmjopen-2019-032347), 2019-11-14
Supplement: bmjopen-2019-032347.reviewer_comments.pdf [file bmjopen-2019-032347.reviewer_comments.pdf]

## PEER REVIEW HISTORY

BMJ Open publishes all reviews undertaken for accepted manuscripts. Reviewers are asked to complete a checklist review form (<http://bmjopen.bmj.com/site/about/resources/checklist.pdf>) and are provided with free text boxes to elaborate on their assessment. These free text comments are reproduced below.

### ARTICLE DETAILS

|                            |                                                                                                                                                                                    |
|----------------------------|------------------------------------------------------------------------------------------------------------------------------------------------------------------------------------|
| <b>TITLE (PROVISIONAL)</b> | Can Waterlow score predict 30-day mortality and length of stay in acutely admitted medical patients (aged $\geq 65$ years)? Evidence from a single centre prospective cohort study |
| <b>AUTHORS</b>             | Wang, James; Smith, Phillip; Sarker, Shah-Jalal; Elands, Sophie; Oliveira, Amelia; Barratt, Claire; Thorn, Chris; Holme, Tom; Lynch, Mary                                          |

### VERSION 1 - REVIEW

|                        |                                                                       |
|------------------------|-----------------------------------------------------------------------|
| <b>REVIEWER</b>        | Paul Hakendorf<br>Southern Adelaide local health network<br>Australia |
| <b>REVIEW RETURNED</b> | 10-Sep-2019                                                           |

|                         |                                                                                                                                                                                                                                                                                                                                                 |
|-------------------------|-------------------------------------------------------------------------------------------------------------------------------------------------------------------------------------------------------------------------------------------------------------------------------------------------------------------------------------------------|
| <b>GENERAL COMMENTS</b> | Thank you for the opportunity to review this interesting paper again. The authors have made substantial improvements to the original and this is much closer to publication quality. Hopefully the publication of this paper will encourage other authors to explore the use of this commonly used score in other ways as previously mentioned. |
|-------------------------|-------------------------------------------------------------------------------------------------------------------------------------------------------------------------------------------------------------------------------------------------------------------------------------------------------------------------------------------------|

|                        |                                              |
|------------------------|----------------------------------------------|
| <b>REVIEWER</b>        | Graeme Ambler<br>University of Bristol<br>UK |
| <b>REVIEW RETURNED</b> | 26-Sep-2019                                  |

|                         |                                                                                                                                                                                                                                                                                                                                                             |
|-------------------------|-------------------------------------------------------------------------------------------------------------------------------------------------------------------------------------------------------------------------------------------------------------------------------------------------------------------------------------------------------------|
| <b>GENERAL COMMENTS</b> | The authors have done an excellent job of revising the statistical analysis and should be commended for their efforts. I have one small residual suggestion:<br><br>- Please give 95% confidence interval for the odds ratio of dying within 30 days per 10 unit increase in Waterlow Score presented on p5 line 42 of the manuscript (just above Table 2). |
|-------------------------|-------------------------------------------------------------------------------------------------------------------------------------------------------------------------------------------------------------------------------------------------------------------------------------------------------------------------------------------------------------|
